# Supplementary material for: Current Technologies for Managing Type 1 Diabetes Mellitus and Their Impact on Quality of Life - A State-of-Art Review
Source: Preprints.org preprint supplement (doi:10.20944/preprints202306.0080.v1), 2023-06-01
Supplement: Supplementary file 1 [file supplementary]

**Table S1.** Various Insulin PPs, adapted from [106][108].

| Insulin PP type                                    | Manufacturer                                     | Properties                                                                                                                                                                                                                                   |
|----------------------------------------------------|--------------------------------------------------|----------------------------------------------------------------------------------------------------------------------------------------------------------------------------------------------------------------------------------------------|
| <i>Simple insulin PPs devices</i>                  |                                                  |                                                                                                                                                                                                                                              |
| V-GO                                               | Zealand Pharma,<br>Zealand, Denmark              | It uses relatively simple insulin dosing regimens and delivers only the basal or bolus insulin to simplify insulin therapy. It must be replaced after 24 h.                                                                                  |
| Simplicity PaQ                                     | CeQur, Luzern,<br>Switzerland                    | It holds up to 200 and 330 bolus insulin units administered in 2-unit increments and could be maintained for 3 days.                                                                                                                         |
| <i>Full-Featured Electromechanical Patch Pumps</i> |                                                  |                                                                                                                                                                                                                                              |
| Omnipod                                            | Insulet Corporation<br>Acton, MA, USA            | It contains an Omnipod insulin management system, which consists of the pod and the personal diabetes manager (PDM), a controller that is wirelessly connected to the PP by Bluetooth.                                                       |
| Accu-Chek Solo micropump                           | Roche Diabetes Care;<br>Mannheim, Germany        | The PP comprises a 90-day reusable pump, a disposable 200-unit insulin reservoir, a disposable pump holder including the cannula, and a remote control.                                                                                      |
| A6 TouchCare System PP                             | Medtrum Technologies,<br>Shanghai, China         | It has a reusable pump base, disposable insulin reservoir, remote control, and cannula.                                                                                                                                                      |
| Panda                                              | SFC Fluidics Fayetteville,<br>USA.               | It was supported by the 2017 "Open-Protocol Automated Insulin Delivery Systems Initiative" of the Juvenile Diabetes Research Foundation (JDRF), which aimed to establish an "open-protocol" AID ecosystem.                                   |
| Sigi PP                                            | AMF Medical; Ecublens,<br>Switzerland            | It works with readily available prefilled insulin cartridges and is controlled directly from a personal smartphone. Every user receives two long-lasting rechargeable PPs to be used interchangeably, avoiding batteries and reducing waste. |
| Equil PP                                           | MicroTech Medical;<br>Hangzhou Zhejiang<br>China | It has a wireless portable diabetes assistant (PDA).                                                                                                                                                                                         |
| GlucorX Equil                                      | GlucorX, Guildford, UK                           | It allows the user to have bolus directly or via PDA control.                                                                                                                                                                                |
| Medisafe WIT                                       | Terumo; Shibuya, Japan                           | Like most other PPs, it allows the basal rate and bolus to be adjusted via remote control                                                                                                                                                    |
| JewelPUMP                                          | Debiotech; Lausanne,<br>Switzerland              | It has a separate controller to deliver bolus insulin doses and a reservoir with 450 units of insulin                                                                                                                                        |
| <i>PPs suitable for AID systems</i>                |                                                  |                                                                                                                                                                                                                                              |
| Omnipod 5 system                                   | Insulet Corporation<br>Acton, MA, USA            | Via the controlling algorithm, the PP can communicate directly with a Dexcom CGM system and a hand-held device with the Omnipod 5 App                                                                                                        |

|       |                                |                                                                                                                                                                                                                                                                  |
|-------|--------------------------------|------------------------------------------------------------------------------------------------------------------------------------------------------------------------------------------------------------------------------------------------------------------|
|       |                                | implemented. With this device, the user can start and stop the automated mode, deliver boluses, change settings, and view glucose data and glucose profiles.                                                                                                     |
| Panda | SFC Fluidics Fayetteville, USA | Interoperable with an open protocol that allows a wireless, secure connection to other devices, such as the CGM systems or AID algorithms, in a future developing AID System made in partnership with the French company Diabeloop (Diabeloop; Grenoble, France) |

PP – patch insulin pump; CGM – continuous glucose monitor; AID – automatic insulin delivery
